# Supplementary material
Source: PubMed Central journal article supplement (PMC4657612)

SUPPLEMENTARY DATA

**Appendix:**

**Table. Insulin treatment protocols**

**1. Basal bolus Insulin Regimen**

**A. Insulin treated patients**

- Give outpatient total daily dose (TDD) - half as glargine and half as glulisine
- Give glargine once daily, at the same time of the day
- Give glulisine in three equally divided doses before meals

**B. No insulin treated patients (diet or oral agents)**

- Hold oral antidiabetic drugs on admission
- Starting insulin TDD:
  - Glucose  $\leq$  150 mg/dl: 0.3 U/kg
  - Glucose  $>$  150 mg/dl: 0.4 U/kg
- Give half of TDD as glargine and half as glulisine
- Give glargine once daily, at the same time of the day
- Give glulisine in three equally divided doses before meals

**C. Glargine insulin adjustment**

- If fasting BG  $<$  60 mg/dl: decrease dose by 20%
- If fasting BG between 60 and 79 mg/dl: decrease dose by 10%
- If fasting BG between 80 and 139 mg/dl: no change
- If fasting BG between 140 and 179 mg/dl: increase dose by 10%
- If fasting BG between 180 and 249: increase dose by 20%
- If fasting BG  $>$ 250 mg/dl: increase dose by 30%

**D. Glulisine insulin adjustment**

| BG (mg/dl) | Insulin sensitive | Usual | Insulin resistant |
|------------|-------------------|-------|-------------------|
| $<$ 80     | -1                | -1    | -2                |
| 80-139     | 0                 | 0     | 0                 |
| 140-159    | 0                 | +1    | +1                |
| 160-199    | +1                | +1    | +2                |
| 200-249    | +2                | +3    | +4                |
| 250-299    | +3                | +5    | +7                |
| 300-349    | +4                | +7    | +10               |
| $>$ 350    | +5                | +8    | +12               |

## SUPPLEMENTARY DATA

### 2. Premixed insulin treatment orders

#### A. Insulin treated patients

Give outpatient TDD divided in 2 doses: 60% before breakfast and 40% before dinner.

#### B. No insulin treated patients (diet or oral agents)

- Hold oral antidiabetic drugs on admission
- Starting insulin TDD:
  - Glucose  $\leq$  150 mg/dl: 0.3 U/kg
  - Glucose  $>$  150 mg/dl: 0.4 U/kg
- Give 2 doses of premixed insulin daily: 60% of TDD before breakfast and 40% before dinner

#### C. Premixed insulin adjustment

- Adjust morning dose according to BG values before lunch
- Adjust evening dose according morning BG values

| BG (mg/dl) | Morning dose | Evening dose |
|------------|--------------|--------------|
| <60        | ↓ 20 %       | ↓ 20 %       |
| 60-79      | ↓ 10 %       | ↓ 10 %       |
| 80-139     | No change    | No change    |
| 140-179    | ↑ 10 %       | ↑ 10 %       |
| 180-249    | ↑ 20 %       | ↑ 20 %       |
| >250       | ↑ 30 %       | ↑ 30 %       |

SUPPLEMENTARY DATA

Supplementary Figure 1. Consort chart

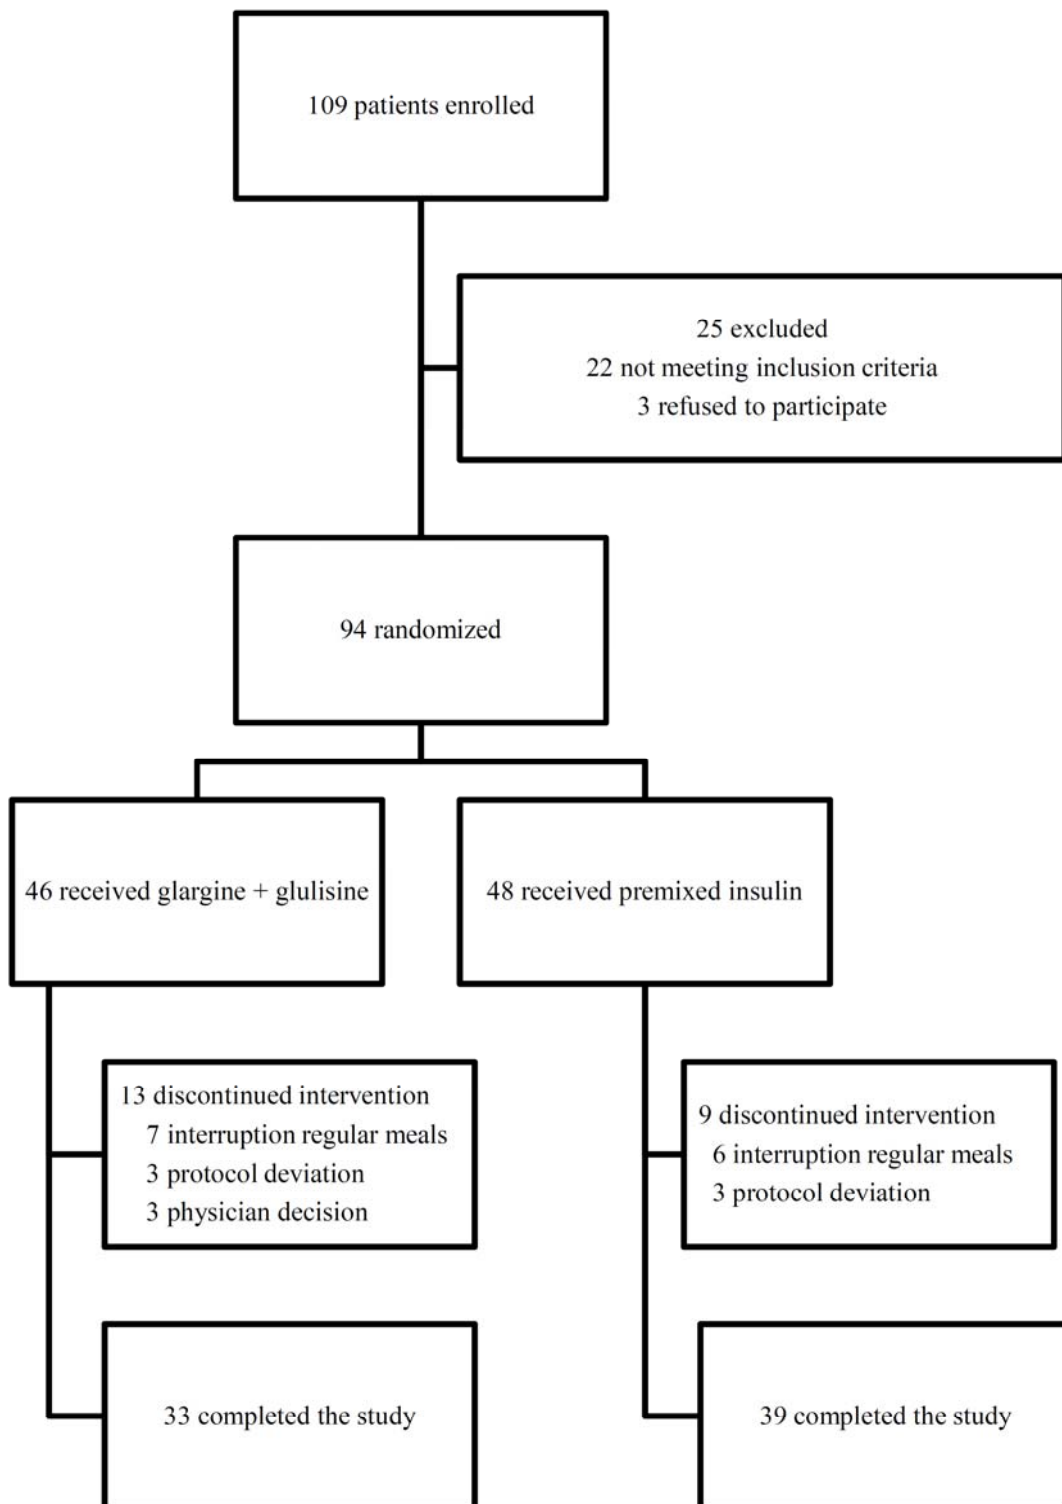

Supplement: supp_dc15-0160v150160_DC150160SupplementaryData.pdf [file supp_dc15-0160v150160_DC150160SupplementaryData.pdf]
